# Supplementary material
Source: publisher site journal article supplement (https://www.dovepress.com/article/404260)
Supplement: Supplementary file 1 [file get_supplementary_file.php]

Supplemental Table 1. Study Inclusion and Exclusion Criteria

| Inclusion |  | Exclusion |
| --- | --- | --- |
| Able to provide Informed Consent in English or Spanish |  | Failure to meet inclusion criteria (including those unable to provide Informed Consent) |
| Over 18 years of age |  | Inability to independently provide symptom data via an email-accessed online survey |
| Male or Female (no predetermined quotas or ratios for participation) |  | Special Populations: pregnant or incarcerated individuals |
| Presenting to a urologist or urogynecologist in an outpatient setting with a history of cUTI and clinically suspected active UTI (e.g., symptomatic with urinalysis positive for leukocyte esterase or nitrites) |  | Complicating conditions: previous prostatectomy, radiotherapy, or bladder/urologic cancer; chronic pelvic pain; untreated overactive bladder; antibiotic use (other than for UTI); chronic (≥ 10 days) indwelling catheters; self-catheterization; or urinary diversion at the time of enrollment |
| Requires microbial testing according to clinician judgment |  | Clinician deems microbial testing unnecessary |

*Definition of cUTI: UTI is considered complicated when the individual has one or more risk factors that predispose to higher treatment failure and poor outcomes. These poor outcomes include persistence of UTI, increasing severity, or occurrence of complications such as urosepsis, recurrence, and perinephric abscess.

Examples of cUTIs include:

- UTIs in the elderly population due to increased chances of comorbidities and immune compromised state
- Recurrent UTIs, which is defined as the occurrence of ≥2 symptomatic episodes within 6 months or ≥3 symptomatic episodes within 12 months
- UTI in patients with anatomic or functional pathology affecting the urinary tract, such as an obstruction, hydronephrosis, renal tract calculi, or colovesical fistula
- UTIs occurring due to an immune compromised state, such as steroid use, post chemotherapy, diabetes, and HIV
- UTIs caused by atypical microorganisms or multi-drug resistant microorganisms. Typical UTI-causing microorganisms include E. coli, P. aeruginosa, several species within the Enterobacteriaceae family (Proteus and Klebsiella), and a few Gram-positive bacteria, such as Staphylococcus saprophyticus and Enterococcus faecalis, as well as fungi, such as Candida sp75.
- UTI in male: UTIs occurring despite the presence of anatomical protective measures as part of the male urinary tract anatomy are cUTI
- UTI in patients with history of radiotherapy to the abdomen or pelvis
- UTIs occurring after instrumentation, nephrostomy tubes, ureteric stents, suprapubic tubes or Foley catheters
- UTI in patients with the history of recurrent UTI
- UTIs in renal transplant patients
- UTIs in patients with impaired renal function
- UTIs following prostatectomies or radiotherapy
